# Supplementary material for: New insights into the ~74 ka Toba eruption from sulfur isotopes of polar ice cores
Source: Copernicus journal article supplement (doi:10.5194/cp-2021-38), 2021-04-14
Supplement: Supplementary file 1 [file cp-2021-38-supplement.zip]

1. Pre-T1

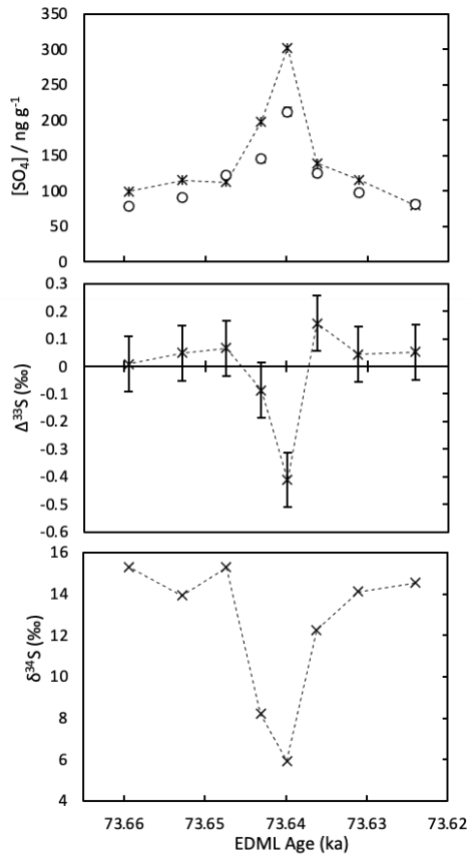

2. T4b

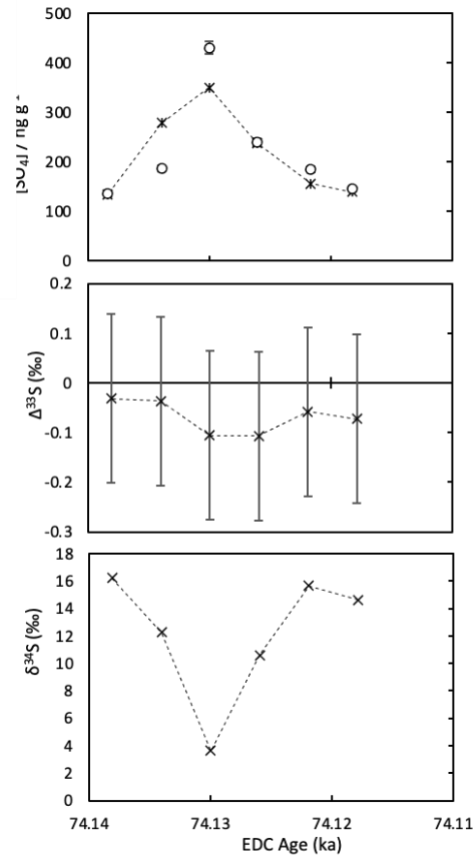

3. T5

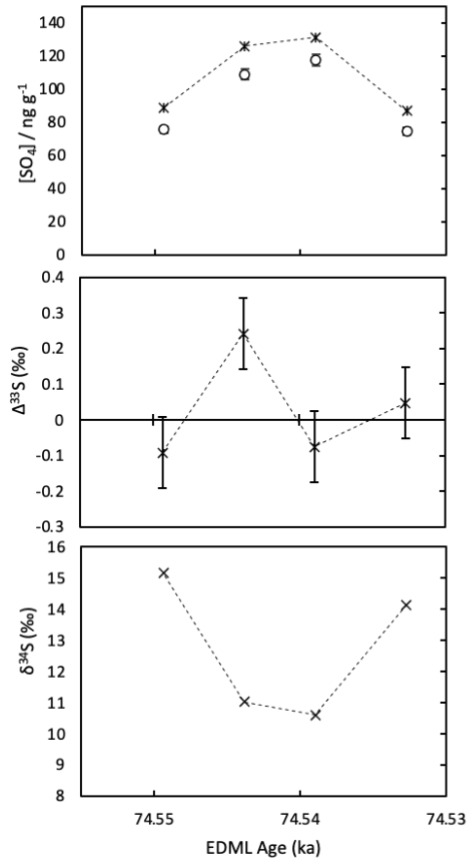

4. T6

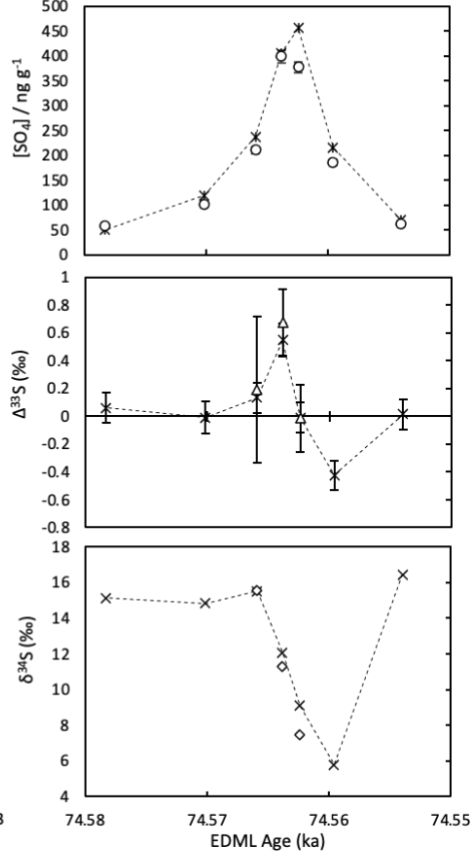

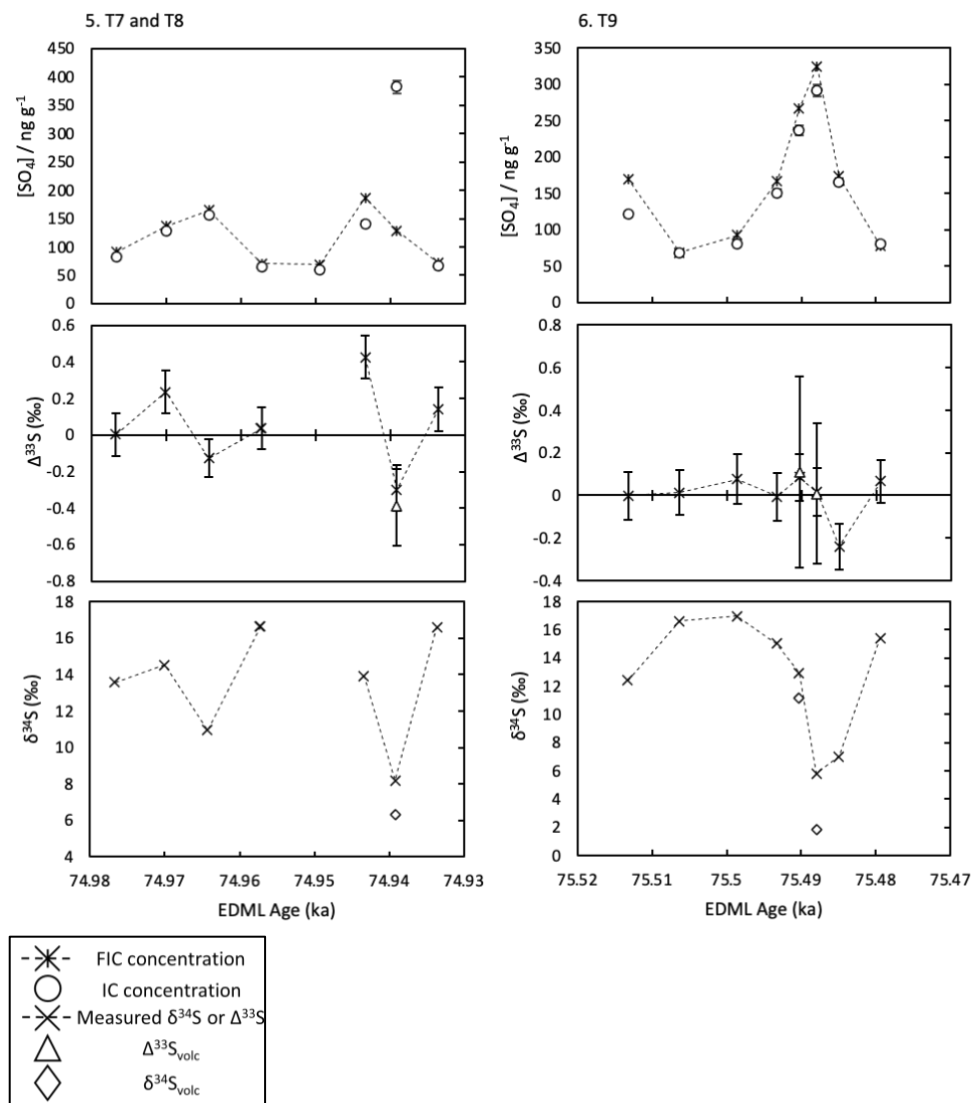

**Figure S1–6.** Sulfate concentration measurements and sulfur isotopic composition data for 7 of the Toba candidates. For sulfate concentration crosses represent fast ion chromatography measurements (FIC) and open symbols are ion chromatography (IC) measurements. Measured isotopic ratios are shown by crosses and open symbols are data points with  $f_{\text{volc}} \geq 0.65$  and have been background corrected. All Error bars indicate  $2\sigma$  for measured ratios and  $1\sigma$  for background corrected ratios, where error bars are not visible the error is smaller than the symbol. All ages are on the AICC2012 age model (Veres et al., 2013).

**Table S1. Summary of IC [S], total sulfate deposition, blank corrected  $\Delta^{33}\text{S}_{\text{measured}}$  and  $\Delta^{33}\text{S}_{\text{volc}}$  data for 14 peaks measured in this study. The error on IC sulfate concentration data is 5%.  $\Delta^{33}\text{S}_{\text{meas}}$  is reported with  $2\sigma$  errors and  $\Delta^{33}\text{S}_{\text{volc}}$  with  $1\sigma$ .**

| Core | Toba Candidate | Max [SO <sub>4</sub> ] (ng g <sup>-1</sup> ) | Total Deposition (mg m <sup>-2</sup> ) | Max +ve $\Delta^{33}\text{S}_{\text{meas}}$ (‰) | Max -ve $\Delta^{33}\text{S}_{\text{meas}}$ (‰) | Maximum $\Delta^{33}\text{S}_{\text{volc}}$ (‰) |
|------|----------------|----------------------------------------------|----------------------------------------|-------------------------------------------------|-------------------------------------------------|-------------------------------------------------|
| EDML | Pre-T1         | 212                                          | 44.0                                   | +0.16 (± 0.10)                                  | -0.41 (± 0.10)                                  | No samples with $f_{\text{volc}} \geq 0.65$     |
| EDC  | T1             | 751                                          | 54.3                                   | -                                               | -3.64 (± 0.17)                                  | -4.75 (± 0.51)                                  |
| EDML | T1             | 306                                          | 87.7                                   | +0.98 (± 0.10)                                  | -2.23 (± 0.10)                                  | -3.08 (± 0.50)                                  |
| EDC  | T2             | 748                                          | 46.5                                   | +0.57 (± 0.17)                                  | -2.42 (± 0.17)                                  | -3.41 (± 0.28)                                  |
| EDML | T2             | 1161                                         | 424.3                                  | +0.61 (± 0.31)                                  | -1.40 (± 0.11)                                  | -1.72 (± 0.24)                                  |
| EDC  | T3             | 1178                                         | 133.5                                  | +0.42 (± 0.32)                                  | -0.78 (± 0.44)                                  | -0.93 (± 0.52)                                  |
| EDML | T3             | 394                                          | 103.3                                  | +0.95 (± 0.10)                                  | -0.06 (± 0.10)                                  | +0.99 (± 0.57) $f_{\text{volc}} = 0.63$         |
| EDML | T4             | 990                                          | 239.5                                  | +0.10 (± 0.12)                                  | -0.40 (± 0.10)                                  | -0.45 (± 0.15)                                  |
| EDC  | T4b            | 431                                          | 26.5                                   | -                                               | -0.11 (± 0.17)                                  | -0.13 (± 0.13)                                  |
| EDML | T5             | 117                                          | 32.7                                   | +0.24 (± 0.10)                                  | -0.08 (± 0.10)                                  | No samples with $f_{\text{volc}} \geq 0.65$     |
| EDML | T6             | 399                                          | 95.8                                   | +0.55 (± 0.12)                                  | -0.42 (± 0.11)                                  | +0.67 (± 0.24)                                  |
| EDML | T7             | 383                                          | 27.5                                   | +0.43 (± 0.12)                                  | -0.30 (± 0.11)                                  | -0.39 (± 0.22)                                  |
| EDML | T8             | 157                                          | 33.3                                   | +0.23 (± 0.12)                                  | -0.13 (± 0.12)                                  | No samples with $f_{\text{volc}} \geq 0.65$     |
| EDML | T9             | 291                                          | 86.1                                   | +0.08 (± 0.11)                                  | -0.24 (± 0.11)                                  | All values within 2sd of 0                      |

**Table S2. Comparison of maximum positive and negative volcanic sulfur MIF signals in both this study and previous studies. See Fig. 1 for Toba candidate ages. A: Arctic, AN: Antarctic core. †These dates are taken from Sigl et al., (2015).**

| Event<br>(if known) | Date C. E.<br>(year) | Core (Location) | Maximum $\Delta^{33}\text{S}_{\text{volc}}$ (‰) |                     | Study                    |
|---------------------|----------------------|-----------------|-------------------------------------------------|---------------------|--------------------------|
|                     |                      |                 | Positive                                        | Negative            |                          |
| Pinatubo            | 1991                 | South Pole (AN) | +0.67 ( $\pm$ 0.16)                             | -                   | Savarino et al.,<br>2003 |
| Samalas             | 1257†                | South Pole (AN) | -                                               | -0.5 ( $\pm$ 0.16)  |                          |
| Pinatubo            | 1991                 | Dome C (AN)     | +1.19 ( $\pm$ 0.12)                             | -1.03 ( $\pm$ 0.12) | Baroni et al.,<br>2007   |
| Agung               | 1963                 | Dome C (AN)     | +1.41 ( $\pm$ 0.12)                             | -0.81 ( $\pm$ 0.12) |                          |
| Tambora             | 1815                 | South Pole (AN) | +0.20 ( $\pm$ 0.12)                             | -0.60 ( $\pm$ 0.12) | Cole-Dai et al.,<br>2009 |
| -                   | 1458†                | South Pole (AN) | +0.60 ( $\pm$ 0.12)                             | -0.55 ( $\pm$ 0.26) |                          |
| Samalas             | 1257†                | Dome C (AN)     | +2.22 ( $\pm$ 0.06)                             | -1.21 ( $\pm$ 0.28) | Gautier et al.,<br>2018  |
| Ruang               | 1597                 | Dome C (AN)     | +2.29 ( $\pm$ 0.34)                             | -                   | Gautier et al.,<br>2019  |
| Tambora             | 1815                 | Tunu (A)        | +2.16 ( $\pm$ 0.54)                             | -0.85 ( $\pm$ 0.33) | Burke et al.,<br>2019    |
| Samalas             | 1257                 | Tunu (A)        | +2.79 ( $\pm$ 0.79)                             | -2.47 ( $\pm$ 0.58) |                          |
| Toba                | T1                   | EDC (AN)        | -                                               | -4.75 ( $\pm$ 0.51) | This study               |
| Toba                | T1                   | EDML (AN)       | +1.34 ( $\pm$ 0.36)                             | -3.08 ( $\pm$ 0.50) |                          |
| Toba                | T2                   | EDC (AN)        | -                                               | -3.41 ( $\pm$ 0.28) |                          |
| Toba                | T2                   | EDML (AN)       | +0.74 ( $\pm$ 0.40)                             | -1.72 ( $\pm$ 0.24) |                          |
| Toba                | T3                   | EDC (AN)        | +0.62 ( $\pm$ 0.15)                             | -0.93 ( $\pm$ 0.52) |                          |
| Toba                | T3                   | EDML (AN)       | +0.99 ( $\pm$ 0.57)                             | -                   |                          |

**Table S3. Summary of the  $\Delta^{33}\text{S}_{\text{volc}}$  vs  $\delta^{34}\text{S}_{\text{volc}}$  York et al., (2004) regression data for this study including each core individually and eruptions where 3 or more data points are available with  $f_{\text{volc}} \geq 0.65$ .**

|                        | Slope             | Intercept          | R <sup>2</sup> |
|------------------------|-------------------|--------------------|----------------|
| All stratospheric data | 0.106 $\pm$ 0.003 | -0.464 $\pm$ 0.034 | 0.964          |
| EDML                   | 0.133 $\pm$ 0.010 | -0.634 $\pm$ 0.065 | 0.863          |
| EDC                    | 0.104 $\pm$ 0.003 | -0.413 $\pm$ 0.035 | 0.964          |
| T1 EDC                 | 0.082 $\pm$ 0.009 | -0.896 $\pm$ 0.366 | 0.972          |
| T2 EDML                | 0.137 $\pm$ 0.015 | -0.651 $\pm$ 0.096 | 0.954          |
| T2 EDC                 | 0.102 $\pm$ 0.004 | -0.813 $\pm$ 0.055 | 0.975          |
| T3 EDC                 | 0.092 $\pm$ 0.056 | -0.343 $\pm$ 0.056 | 0.936          |
| T6 EDML                | 0.081 $\pm$ 0.063 | -0.485 $\pm$ 0.647 | -0.659         |
| T4 EDML                | 0.037 $\pm$ 0.018 | -0.307 $\pm$ 0.099 | 0.183          |

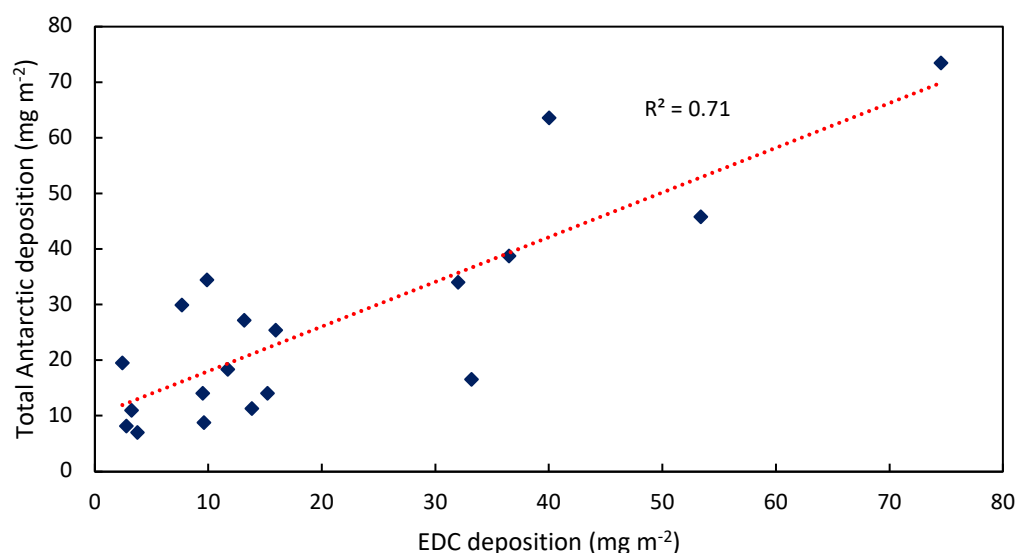

**Figure S7.** Comparison of sulfate deposition in EDC to total Antarctic deposition in corresponding events in Sigl et al., (2015).

**Table S3.** Sulfate deposition for Common Era events for EDC and Antarctic total. Antarctic depositions are from Sigl et al., (2015) with ages calculated with the WD2014 age model. EDC ages are determined from the AICC2012 age model.

| Sigl et al.,<br>2015 date<br>(CE) | EDC date (CE) | Sulfate deposition (mg m <sup>-2</sup> ) |                 |
|-----------------------------------|---------------|------------------------------------------|-----------------|
|                                   |               | Dome C                                   | Antarctic total |
| 1815                              | 1824          | 53.40                                    | 45.77           |
| 1809                              | 1818          | 15.95                                    | 25.41           |
| 1674                              | 1673          | 2.82                                     | 8.11            |
| 1458                              | 1453          | 40.01                                    | 63.64           |
| 1277                              | 1276          | 7.67                                     | 29.92           |
| 1258                              | 1254          | 74.54                                    | 73.42           |
| 1172                              | 1172          | 2.45                                     | 19.47           |
| 1039                              | 1036          | 3.27                                     | 10.94           |
| 745                               | 741           | 9.65                                     | 8.79            |
| 714                               | 705           | 3.76                                     | 7.01            |
| 682                               | 672           | 36.49                                    | 38.71           |
| 575                               | 569           | 32.03                                    | 34.06           |
| 540                               | 540           | 9.90                                     | 34.44           |
| 435                               | 429           | 13.19                                    | 27.21           |
| 304                               | 298           | 33.19                                    | 16.60           |
| 266                               | 259           | 13.86                                    | 11.27           |
| 236                               | 232           | 15.20                                    | 14.07           |
| 206                               | 199           | 9.53                                     | 14.03           |
| 170                               | 163           | 11.73                                    | 18.39           |

**Table S4. Concentration and sulfur isotopic composition of procedural blanks measured at the University of St Andrews.**

|         | <b>nmol</b> | <b><math>\delta^{34}\text{S}</math> (‰)</b> | <b><math>1\sigma</math></b> |
|---------|-------------|---------------------------------------------|-----------------------------|
|         | 0.20        | 4.28                                        | 0.94                        |
|         | 0.36        | 6.24                                        | 0.60                        |
|         | 0.33        | 3.66                                        | 0.40                        |
|         | 0.16        | 2.73                                        | 0.74                        |
|         | 0.21        | 3.68                                        | 0.50                        |
|         | 0.23        | 4.59                                        | 0.46                        |
|         | 0.22        | 3.53                                        | 0.46                        |
|         | 0.24        | 2.93                                        | 0.44                        |
|         | 0.24        | 4.06                                        | 0.46                        |
|         | 0.22        | 3.81                                        | 0.44                        |
|         | 0.29        | 4.11                                        | 0.38                        |
|         | 0.18        | 4.35                                        | 0.54                        |
|         | 0.23        | 3.27                                        | 0.46                        |
|         | 0.22        | 3.08                                        | 0.39                        |
|         | 0.26        | 4.84                                        | 0.42                        |
|         | 0.33        | 4.58                                        | 0.38                        |
|         | 0.25        | 5.89                                        | 0.43                        |
|         | 0.14        | 8.17                                        | 1.06                        |
|         |             |                                             |                             |
| Average | 0.24        | 4.32                                        |                             |
| 2 s.d.  | 0.12        | 2.67                                        |                             |

**Table S5. Sulfur isotopic composition of Switzer Falls consistency standard measured at the University of St Andrews.**

|         | $\delta^{34}\text{S}$ (‰) | 1 $\sigma$ | $\delta^{33}\text{S}$ (‰) | 1 $\sigma$ | $\Delta^{33}\text{S}$ (‰) | 1 $\sigma$ |
|---------|---------------------------|------------|---------------------------|------------|---------------------------|------------|
|         | 4.13                      | 0.02       | 2.10                      | 0.06       | -0.02                     | 0.05       |
|         | 4.14                      | 0.02       | 2.20                      | 0.05       | 0.06                      | 0.09       |
|         | 4.15                      | 0.02       | 2.16                      | 0.05       | 0.03                      | 0.04       |
|         | 4.13                      | 0.02       | 2.11                      | 0.05       | -0.02                     | 0.09       |
|         | 4.14                      | 0.02       | 2.07                      | 0.05       | -0.06                     | 0.05       |
|         | 4.16                      | 0.02       | 2.12                      | 0.06       | -0.02                     | 0.09       |
|         | 4.12                      | 0.02       | 2.15                      | 0.05       | 0.03                      | 0.11       |
|         | 4.12                      | 0.02       | 2.14                      | 0.05       | 0.02                      | 0.07       |
|         | 4.18                      | 0.02       | 2.24                      | 0.06       | 0.09                      | 0.12       |
|         | 4.11                      | 0.02       | 2.16                      | 0.05       | 0.05                      | 0.04       |
|         | 4.21                      | 0.02       | 2.19                      | 0.05       | 0.03                      | 0.04       |
|         | 4.26                      | 0.02       | 2.28                      | 0.07       | 0.09                      | 0.08       |
|         | 4.16                      | 0.03       | 1.99                      | 0.11       | -0.15                     | 0.10       |
|         | 4.24                      | 0.02       | 1.96                      | 0.07       | -0.22                     | 0.07       |
|         | 4.22                      | 0.02       | 2.07                      | 0.07       | -0.10                     | 0.06       |
|         | 4.24                      | 0.02       | 1.99                      | 0.07       | -0.19                     | 0.10       |
|         | 4.30                      | 0.02       | 2.16                      | 0.06       | -0.05                     | 0.06       |
|         | 4.12                      | 0.03       | 2.14                      | 0.07       | 0.02                      | 0.13       |
|         | 4.09                      | 0.02       | 2.13                      | 0.07       | 0.02                      | 0.08       |
|         | 4.12                      | 0.02       | 2.17                      | 0.07       | 0.05                      | 0.09       |
|         | 4.18                      | 0.02       | 2.02                      | 0.07       | -0.13                     | 0.08       |
|         | 4.15                      | 0.02       | 2.19                      | 0.06       | 0.06                      | 0.06       |
|         | 4.15                      | 0.02       | 2.21                      | 0.08       | 0.07                      | 0.11       |
|         | 3.90                      | 0.02       | 1.92                      | 0.07       | -0.09                     | 0.08       |
|         | 4.07                      | 0.02       | 2.02                      | 0.07       | -0.08                     | 0.07       |
|         |                           |            |                           |            |                           |            |
| Average | 4.15                      |            | 2.12                      |            | -0.02                     |            |
| 2 s.d.  | 0.15                      |            | 0.18                      |            | 0.17                      |            |

## References

- Baroni, M., Thiemens, M. H., Delmas, R. J., and Savarino, J.: Mass-Independent Sulfur Isotopic Compositions in Stratospheric Volcanic Eruptions, *Science*, 315, 84–87, <https://doi.org/10.1126/science.1131754>, 2007.
- Burke, A., Moore, K. A., Sigl, M., Nita, D. C., McConnell, J. R., and Adkins, J. F.: Stratospheric eruptions from tropical and extra-tropical volcanoes constrained using high-resolution sulfur isotopes in ice cores, *Earth Planet. Sci. Lett.*, 521, 113–119, <https://doi.org/10.1016/j.epsl.2019.06.006>, 2019.
- Cole-Dai, J., Ferris, D., Lanciki, A., Savarino, J., Baroni, M., and Thiemens, M. H.: Cold decade (AD 1810–1819) caused by Tambora (1815) and another (1809) stratospheric volcanic eruption, *Geophys. Res. Lett.*, 36, 1–6, <https://doi.org/10.1029/2009GL040882>, 2009.

Gautier, E., Savarino, J., Erbland, J., and Farquhar, J.: SO<sub>2</sub> Oxidation Kinetics Leave a Consistent Isotopic Imprint on Volcanic Ice Core Sulfate, *J. Geophys. Res. Atmos.*, 123, 9801–9812, <https://doi.org/10.1029/2018JD028456>, 2018.

Gautier, E., Savarino, J., Hoek, J., Erbland, J., Caillon, N., Hattori, S., Albarede, F., Farquhar, J., and Yoshida, N.: 2600-years of stratospheric volcanism through sulfate isotopes, *Nat. Commun.*, 10, 1–7, <https://doi.org/10.1038/s41467-019-08357-0>, 2019.

Savarino, J., Romero, A., Cole-Dai, J., Bekki, S., and Thiemens, M. H.: UV induced mass-independent sulfur isotope fractionation in stratospheric volcanic sulfate, *Geophys. Res. Lett.*, 30, 2131, <https://doi.org/10.1029/2003GL018134>, 2003.

Sigl, M., Winstrup, M., McConnell, J. R., Welten, K. C., Plunkett, G., Ludlow, F., Büntgen, U., Caffee, M., Chellman, N., Dahl-Jensen, D., Fischer, H., Kipfstuhl, S., Kostick, C., Maselli, O. J., Mekhaldi, F., Mulvaney, R., Muscheler, R., Pasteris, D. R., Pilcher, J. R., Salzer, M., Schüpbach, S., Steffensen, J. P., Vinther, B. M., and Woodruff, T. E.: Timing and climate forcing of volcanic eruptions for the past 2,500 years., *Nature*, 523, 543–9, <https://doi.org/https://doi.org/10.1038/nature14565>, 2015.

Veres, D., Bazin, L., Landais, A., Toyé Mahamadou Kele, H., Lemieux-Dudon, B., Parrenin, F., Martinerie, P., Blayo, E., Blunier, T., Capron, E., Chappellaz, J., Rasmussen, S. O., Severi, M., Svensson, A., Vinther, B., and Wolff, E. W.: The Antarctic ice core chronology (AICC2012): An optimized multi-parameter and multi-site dating approach for the last 120 thousand years, *Clim. Past*, 9, 1733–1748, <https://doi.org/10.5194/cp-9-1733-2013>, 2013.

York, D., Evensen, N. M., Martínez, M. L., and De Basabe Delgado, J.: Unified equations for the slope, intercept, and standard errors of the best straight line, *Am. J. Phys.*, 72, 367–375, <https://doi.org/10.1119/1.1632486>, 2004.
